# Supplementary material for: Personal Freedom and Public Responsibility: Remaining Questions after First Case of HIV Transmission via Blood Transfusion in North Serbia
Source: MDPI journal article supplement (doi:10.3390/healthcare10081397), 2022-07-27
Supplement: s1 [file s1]

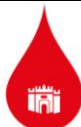

## DONOR QUESTIONNAIRE FOR BLOOD, PLATELETS AND PLASMA

Donor No.: |\_|\_|\_|\_|\_|\_|\_|\_| Date: \_\_\_\_\_

Surname (middle name) first name: \_\_\_\_\_

Unique ID number: |\_|\_|\_|\_|\_|\_|\_|\_|\_|\_|\_|\_|\_|\_| Date of birth: \_\_\_\_\_ Sex: M F

Address: \_\_\_\_\_ State/province: \_\_\_\_\_

City/town: \_\_\_\_\_ Tel. (home): \_\_\_\_\_ Tel. (home): \_\_\_\_\_ Tel. (mobile) : \_\_\_\_\_

Company/faculty/school: \_\_\_\_\_ Profession: \_\_\_\_\_

No. of previous donations: \_\_\_\_\_

Signature: \_\_\_\_\_

|                                                          |                  |                                           |
|----------------------------------------------------------|------------------|-------------------------------------------|
| <b>Donor registration and admission</b>                  |                  | <b>Blood/platelet/plasma unit barcode</b> |
| Blood group: _____                                       |                  |                                           |
| Note for medical doctor: _____                           |                  |                                           |
| _____                                                    |                  | Official signature: _____                 |
| <b>Hemoglobin/hematocrit tests</b>                       |                  | <b>Blood group test</b>                   |
| Copper sulphate: ____ Normal level: ____ Low level: ____ |                  | A B AB O                                  |
| Hemoglobinometer: ____ Read off value: ____              |                  |                                           |
|                                                          |                  | Tech. signature: _____                    |
| <b>Medical checkup</b>                                   |                  |                                           |
| Lungs: _____ Heart _____ Blood pressure: ____/____       |                  | Accepted                                  |
| Weight: _____ Height: _____                              |                  | Rejected                                  |
| Pouch type: _____                                        |                  | Rejection reason: _____                   |
| Note: _____                                              |                  | _____                                     |
|                                                          |                  | MD signature: _____                       |
| <b>Pouch preparation</b>                                 |                  | <b>Pouch ID No.</b>                       |
|                                                          |                  | Tech. signature: _____                    |
| <b>Venipuncture</b>                                      |                  |                                           |
| Puncture spot                                            | Taken blood vol. | Donation start: _____ h _____ min         |
| Left arm  __                                             | 405-495 ml  __   | Donation end: _____ h _____ min           |
| Right arm  __                                            | < 405 ml  __     |                                           |
|                                                          | > 495 ml  __     |                                           |
| Premature donation interruption reason: _____            |                  |                                           |
| MD signature: _____                                      |                  | Tech. signature: _____                    |

### FOR DONOR

With regard to your safety and the safety of the blood transfusion treatment of the patients, please, read the questionnaire and answer each question truthfully. Your answers and other personal information are fully confidential and will be used only by the authorized transfusion institution.

|     |                                                                                                                                                                                                                                                                                                                                                                                                                                                                                                                                                                                                                                                |                                               |                                        |
|-----|------------------------------------------------------------------------------------------------------------------------------------------------------------------------------------------------------------------------------------------------------------------------------------------------------------------------------------------------------------------------------------------------------------------------------------------------------------------------------------------------------------------------------------------------------------------------------------------------------------------------------------------------|-----------------------------------------------|----------------------------------------|
| 1.  | Have you donated blood, platelet or plasma before?                                                                                                                                                                                                                                                                                                                                                                                                                                                                                                                                                                                             | Yes                                           | No                                     |
| 2.  | Have you ever been rejected as blood, platelet or plasma donor?                                                                                                                                                                                                                                                                                                                                                                                                                                                                                                                                                                                | Yes                                           | No                                     |
| 3.  | Do you feel healthy, rested and capable to donate blood, platelet or plasma?                                                                                                                                                                                                                                                                                                                                                                                                                                                                                                                                                                   | Yes                                           | No                                     |
| 4.  | Have you had a meal before coming to donate blood, platelet or plasma?                                                                                                                                                                                                                                                                                                                                                                                                                                                                                                                                                                         | Yes                                           | No                                     |
| 5.  | Do you have a dangerous profession or hobby?                                                                                                                                                                                                                                                                                                                                                                                                                                                                                                                                                                                                   | Yes                                           | No                                     |
| 6.  | Do you take any medication regularly?                                                                                                                                                                                                                                                                                                                                                                                                                                                                                                                                                                                                          | Yes                                           | No                                     |
| 7.  | Have you taken any medication in the last 2 or 3 days (e.g., ibuprofen, caffetin, metamizole)?                                                                                                                                                                                                                                                                                                                                                                                                                                                                                                                                                 | Yes                                           | No                                     |
| 8.  | Do you take Aspirin regularly? Have you taken it in the last 5 days?                                                                                                                                                                                                                                                                                                                                                                                                                                                                                                                                                                           | Yes                                           | No                                     |
| 9.  | Have you been treated or examined in the hospital before? Are you currently under examination or on sick leave?                                                                                                                                                                                                                                                                                                                                                                                                                                                                                                                                | Yes                                           | No                                     |
| 10. | Have you undergone tooth extraction in the last 7 days?                                                                                                                                                                                                                                                                                                                                                                                                                                                                                                                                                                                        | Yes                                           | No                                     |
| 11. | Have you had a fever over 38°C or cold, or taken any antibiotics?                                                                                                                                                                                                                                                                                                                                                                                                                                                                                                                                                                              | Yes                                           | No                                     |
| 12. | Have you had any vaccinations or other shots in the last 12 months?                                                                                                                                                                                                                                                                                                                                                                                                                                                                                                                                                                            | Yes                                           | No                                     |
| 13. | Have you rapidly lost weight in the last 6 months?                                                                                                                                                                                                                                                                                                                                                                                                                                                                                                                                                                                             | Yes                                           | No                                     |
| 14. | Have you had tick bites in the last 12 months, and have you been to see a doctor because of it?                                                                                                                                                                                                                                                                                                                                                                                                                                                                                                                                                | Yes                                           | No                                     |
| 15. | Have you ever been treated for epilepsy (seizures), diabetes, asthma, tuberculosis, infarct, stroke, cancer, mental disorder, or malaria?                                                                                                                                                                                                                                                                                                                                                                                                                                                                                                      | Yes                                           | No                                     |
| 16. | Do you have any chronic disease of the heart, lungs, kidneys, liver, stomach and intestines, bones and joints, nervous system, blood and blood vessels?                                                                                                                                                                                                                                                                                                                                                                                                                                                                                        | Yes                                           | No                                     |
| 17. | Have you ever had problems with the thyroid or pituitary gland, or taken any hormone treatment?                                                                                                                                                                                                                                                                                                                                                                                                                                                                                                                                                | Yes                                           | No                                     |
| 18. | Do you have any skin disorders or allergies?                                                                                                                                                                                                                                                                                                                                                                                                                                                                                                                                                                                                   | Yes                                           | No                                     |
| 19. | Do you have prolonged bleeding after an injury or spontaneous bruising?                                                                                                                                                                                                                                                                                                                                                                                                                                                                                                                                                                        | Yes                                           | No                                     |
| 20. | In the last 6 months, have you:<br>a) Had surgery or received blood transfusion?<br>b) Traveled or been living abroad?<br>c) Had acupuncture, piercing or tattoo?                                                                                                                                                                                                                                                                                                                                                                                                                                                                              | Yes<br>Yes<br>Yes                             | No<br>No<br>No                         |
| 21. | Have you had any alcoholic beverages in the last 6 hours?                                                                                                                                                                                                                                                                                                                                                                                                                                                                                                                                                                                      | Yes                                           | No                                     |
| 22. | Certain states and behaviors:<br>a) Are you suffering or have ever suffered from hepatitis (jaundice) type A, B or C?<br>b) Are you living with or have had any contact with a person suffering from hepatitis (jaundice)?<br>c) Do you think you might be at risk of getting an HIV infection?<br>d) Have you ever done any drugs?<br>e) Have you ever taken OTC supplements for bodybuilding (steroid supplements)?<br>f) Have you ever received money, drugs or other payment for sexual services?<br>g) Are you aware of all the possible ways you might have been exposed to a risk for getting infectious, blood-transmissible diseases? | Yes<br>Yes<br>Yes<br>Yes<br>Yes<br>Yes<br>Yes | No<br>No<br>No<br>No<br>No<br>No<br>No |
| 23. | Have you had unprotected sexual intercourse in the last 6 months:<br>a) With an HIV positive person?<br>b) With hepatitis (jaundice) type B or C positive person?<br>c) With a person who takes money, drugs or other payment for sexual services?<br>d) With a person who has ever used needles to take drugs or steroids, or anything not prescribed by their doctor?<br>e) With a person who might have put you at risk of getting an STI?<br>f) Have you had anal sexual intercourse in the last 6 months?                                                                                                                                 | Yes<br>Yes<br>Yes<br>Yes<br>Yes<br>Yes<br>Yes | No<br>No<br>No<br>No<br>No<br>No<br>No |

### FOR WOMEN

|     |                                                               |     |    |
|-----|---------------------------------------------------------------|-----|----|
| 24. | Are you pregnant?                                             | Yes | No |
| 25. | Do you currently have menstrual bleeding?                     | Yes | No |
| 26. | Have you given birth or had an abortion in the last 6 months? | Yes | No |

### DONOR CONSENT FOR BLOOD, PLATELET AND PLASMA

**I finished the Donor questionnaire for blood, platelet and plasma, am willingly donating blood, platelet and plasma, and I hereby declare that:**

|                                                                                                                                                |  |
|------------------------------------------------------------------------------------------------------------------------------------------------|--|
| I have read and understood the educational materials, and have truthfully answered all the questions above, and filled in all the information; |  |
| I have been informed that my blood will be tested on blood-transmissible diseases;                                                             |  |
| I have been informed that I may withdraw from the donation procedure at any time before the beginning, and during the donation process;        |  |
| I have been informed about the purpose of the blood, platelet and plasma donation;                                                             |  |
| I am aware of the common blood donation risks and possible reactions, and the scope of blood tests;                                            |  |
| I have been informed about the confidentiality policy regarding provided personal information;                                                 |  |
| I have had an opportunity to ask questions;                                                                                                    |  |
| I am pleased with the answers to all of my questions;                                                                                          |  |
| The information I provided is truthful to the best of my knowledge;                                                                            |  |
| I confirm the credibility of the information I provided.                                                                                       |  |

### THANK YOU FOR DONATING

Note:

♣ Quit

♣ Refused

♣ Consent withdrawn

Donor signature: \_\_\_\_\_
